# Supplementary material
Source: PubMed Central journal article supplement (PMC11156232)
Supplement: NIHMS1995489-supplement-1.pdf [file NIHMS1995489-supplement-1.pdf]

## Appendix

**Table S1. Timing of ACA Medicaid Expansion States**

|    | Early Expansion States | Expansion States (January 2014) | Late Expansion States | Non-Expansion States | No ECLS-K Data   |
|----|------------------------|---------------------------------|-----------------------|----------------------|------------------|
| 1  | California             | Arizona                         | Indiana               | Alabama              | Alaska           |
| 2  | Connecticut            | Arkansas                        | Michigan              | Florida              | Delaware         |
| 3  | Hawaii                 | Colorado                        | Montana               | Georgia              | Idaho            |
| 4  | Massachusetts          | Illinois                        | New Hampshire         | Kansas               | Kentucky         |
| 5  | Minnesota              | Iowa                            | Pennsylvania          | Louisiana**          | Maine            |
| 6  | New Jersey             | Maryland                        |                       | Mississippi          | North Dakota     |
| 7  | New York               | Nevada                          |                       | Missouri             | Rhode Island     |
| 8  | Vermont                | New Mexico                      |                       | Nebraska             | South Dakota     |
| 9  | Washington             | Ohio                            |                       | North Carolina       | Washington, D.C. |
| 10 |                        | Oregon                          |                       | Oklahoma             | Wyoming          |
| 11 |                        | West Virginia                   |                       | South Carolina       |                  |
| 12 |                        | Wisconsin*                      |                       | Tennessee            |                  |
| 13 |                        |                                 |                       | Texas                |                  |
| 14 |                        |                                 |                       | Utah                 |                  |
| 15 |                        |                                 |                       | Virginia             |                  |

\* Although Wisconsin did not technically expand its Medicaid program under the ACA, it covers adults up to 100% FPL.

\*\*Louisiana expanded in July 2016, but this timing is beyond the study period. Therefore, we consider it a non-expansion state in this study.

**Table S2. Linear Pre-trends Test Among Children from Low-Income Households (< 138% FPL)**

| <b>A. Academic Outcomes</b>       | Reading Scores          | Math Scores                 |                   |
|-----------------------------------|-------------------------|-----------------------------|-------------------|
|                                   | (1)                     | (2)                         |                   |
| Expansion x Wave                  | 0.227<br>(0.321)        | 0.672*<br>(0.295)           |                   |
| Observations (Child-year)         | 13,840                  | 13,800                      |                   |
| Observations (Child)              | 3,595                   | 3,595                       |                   |
| <b>B. Socioemotional Outcomes</b> | Externalizing Behaviors | Internalizing Behaviors     | Social Skills     |
|                                   | (1)                     | (2)                         | (3)               |
| Expansion x Wave                  | 0.010<br>(0.013)        | 0.018<br>(0.011)            | -0.019<br>(0.014) |
| Observations (Child-year)         | 12,450                  | 12,330                      | 12,110            |
| Observations (Child)              | 3,510                   | 3,510                       | 3,510             |
| <b>C. Family Functioning</b>      | Reading Outside School  | Parental Help with Homework | Dinner Together   |
|                                   | (1)                     | (2)                         | (3)               |
| Expansion x Wave                  | -0.018<br>(0.967)       | 0.024<br>(0.086)            | 0.015~<br>(0.009) |
| Observations (Child-year)         | 6,580                   | 6,600                       | 9,600             |
| Observations (Child)              | 3,550                   | 3,560                       | 3,590             |

Notes: Each cell corresponds to a different OLS regression. Expansion x Wave is an interaction between a binary variable representing whether a child resided in a state that expanded its Medicaid program and a linear wave term. The regressions also include wave, child fixed effects, state-level covariates, and are weighted by sampling weights. Sample is restricted to the pre-expansion time period only. Heteroscedasticity-robust standard errors in parentheses, clustered at the state-level. Sample size rounded to the nearest 10 as per dataset guidelines; ~  $p < 0.10$ , \*  $p < 0.05$ , \*\*  $p < 0.01$ , \*\*\*  $p < 0.001$ .

**Table S3. Heterogenous Effects on Primary Outcomes Among Children from Low-Income Households (< 138% FPL)**

|                           | A. Reading Scores   |                     |          | B. Math Scores      |                     |          |
|---------------------------|---------------------|---------------------|----------|---------------------|---------------------|----------|
| A. By Race/Ethnicity      | White               | Black               | Hispanic | White               | Black               | Hispanic |
|                           | (1)                 | (2)                 | (3)      | (1)                 | (2)                 | (3)      |
| Expansion                 | -0.103              | 2.161*              | 1.070    | -1.243              | 2.972*              | -1.110   |
|                           | (1.020)             | (0.956)             | (0.758)  | (1.117)             | (1.185)             | (1.066)  |
| Mean of DV                | 51.77               | 50.34               | 48.36    | 33.43               | 29.57               | 28.99    |
| R-Squared                 | 0.934               | 0.925               | 0.930    | 0.943               | 0.929               | 0.940    |
| Observations (Child-year) | 4,380               | 2,350               | 8,410    | 4,370               | 2,360               | 8,420    |
| Observations (Child)      | 640                 | 350                 | 1,250    | 640                 | 350                 | 1,250    |
| B. By Marital Status      | Not Married         | Married             |          | Not Married         | Married             |          |
|                           | (1)                 | (2)                 |          | (1)                 | (2)                 |          |
| Expansion                 | 1.460               | 0.738               |          | 2.038~              | -1.134              |          |
|                           | (0.883)             | (0.670)             |          | (1.051)             | (1.078)             |          |
| Mean of DV                | 50.68               | 49.81               |          | 31.21               | 30.87               |          |
| R-Squared                 | 0.919               | 0.928               |          | 0.926               | 0.938               |          |
| Observations (Child-year) | 4,780               | 12,290              |          | 4,780               | 12,270              |          |
| Observations (Child)      | 1,110               | 1,110               |          | 1,110               | 1,110               |          |
| C. By Income              | Below Median Income | Above Median Income |          | Below Median Income | Above Median Income |          |
|                           | (1)                 | (2)                 |          | (1)                 | (2)                 |          |
| Expansion                 | 1.801**             | 0.425               |          | 0.825               | -1.069              |          |
|                           | (0.628)             | (0.802)             |          | (1.250)             | (0.987)             |          |
| Mean of DV                | 49.16               | 50.97               |          | 29.70               | 32.30               |          |
| R-Squared                 | 0.925               | 0.933               |          | 0.931               | 0.944               |          |
| Observations (Child-year) | 8,610               | 8,460               |          | 8,600               | 8,450               |          |
| Observations (Child)      | 1,270               | 1,250               |          | 1,270               | 1,250               |          |

Notes: Each column of each panel corresponds to a different OLS regression model. Expansion represents  $\beta_1$  from equation (1), and measures the average effect of the Medicaid expansions after it took place. The regressions also include wave, child fixed effects, state-level covariates, and are weighted by sampling weights. Heteroscedasticity-robust standard errors, in parentheses, are clustered at the state level. Mean of each dependent variable (DV) provides the within-child average of the DV after controlling for just wave fixed effects. To economize on space, we report these heterogenous effects only for our primary outcomes of interest (math and reading scores). Analogous results for all other outcomes are available from the authors on request. Sample sizes are rounded to the nearest 10 as per dataset guidelines. ~  $p < 0.10$ , \*  $p < 0.05$ , \*\*  $p < 0.01$ , \*\*\*  $p < 0.001$ .

**Table S4. Pre-ACA Parental Income Eligibility Thresholds (as of 2011) for Expansion States included in ECLS-K Data, % of FPL**

|               |     |               |     |
|---------------|-----|---------------|-----|
| ARIZONA       | 106 | NEW JERSEY    | 200 |
| ARKANSAS      | 17  | NEW MEXICO    | 67  |
| CALIFORNIA    | 106 | NEW YORK      | 150 |
| COLORADO      | 106 | OHIO          | 90  |
| CONNECTICUT   | 191 | OREGON        | 40  |
| HAWAII        | 100 | PENNSYLVANIA  | 46  |
| ILLINOIS      | 191 | VERMONT       | 191 |
| INDIANA       | 36  | WASHINGTON    | 74  |
| IOWA          | 83  | WEST VIRGINIA | 33  |
| MARYLAND      | 116 | WISCONSIN     | 200 |
| MASSACHUSETTS | 133 |               |     |
| MICHIGAN      | 64  |               |     |
| MINNESOTA     | 215 |               |     |
| MONTANA       | 56  |               |     |
| NEVADA        | 88  |               |     |
| NEW HAMPSHIRE | 49  |               |     |

*Source:* Data come from Kaiser Family Foundation, "Medicaid Income Eligibility Limits for Parents, 2002-2020."

<https://www.kff.org/medicaid/state-indicator/medicaid-income-eligibility-limits-for-parents/>

**Table S5. Impact of the ACA Medicaid Expansion on Child Development Among Children from Low-Income Households (< 138% FPL) – Additional Sensitivity Checks**

| <b>A. Early vs. Late Exclusions</b> | Reading Scores    |                  | Math Scores       |                  |
|-------------------------------------|-------------------|------------------|-------------------|------------------|
| Exclusion                           | Early             | Late             | Early             | Late             |
| Expansion                           | 1.272~<br>(0.642) | 0.931<br>(0.661) | 0.752<br>(1.126)  | 0.110<br>(1.256) |
| Mean of DV                          | 50.84             | 50.84            | 31.38             | 31.38            |
| Observations (Child-year)           | 12,260            | 15,820           | 12,260            | 15,810           |
| Observations (Child)                | 1,810             | 2,340            | 1,810             | 2,340            |
| R-squared                           | 0.928             | 0.928            | 0.935             | 0.936            |
| <b>B. CCS Adoption</b>              | Reading Scores    |                  | Math Scores       |                  |
| Expansion                           | 1.106~<br>(0.582) |                  | 0.044<br>(1.121)  |                  |
| Mean of DV                          | 50.84             |                  | 31.38             |                  |
| Observations (Child-year)           | 17,070            |                  | 17,060            |                  |
| Observations (Child)                | 2,520             |                  | 2,520             |                  |
| R-squared                           | 0.929             |                  | 0.937             |                  |
| <b>C. No Sampling Weights</b>       | Reading Scores    |                  | Math Scores       |                  |
| Expansion                           | 0.753~<br>(0.439) |                  | -0.414<br>(0.820) |                  |
| Mean of DV                          | 50.02             |                  | 30.94             |                  |
| Observations (Child-year)           | 26,300            |                  | 26,280            |                  |
| Observations (Child)                | 4,270             |                  | 4,270             |                  |
| R-squared                           | 0.926             |                  | 0.935             |                  |

Notes: Each column of each panel corresponds to a different OLS regression model. Each model includes wave and child fixed effects and sampling weights. Expansion represents  $\beta_1$  from equation (1), and measures the average effect of the Medicaid expansions after it took place. Panel A adjusts for early and late expansion exclusions; Panel B adjusts for state-year, common core adoption; and Panel C provides unweighted estimates. Mean of each dependent variable (DV) provides the within-child average of the DV after controlling for just wave fixed effects. Heteroscedasticity-robust standard errors, in parentheses, are clustered at the state level. All models include time-varying state-level covariates as well. Sample sizes are rounded to the nearest 10 as per dataset guidelines.  $\sim p < 0.10$ ,  $* p < 0.05$ ,  $** p < 0.01$ ,  $*** p < 0.001$ .

**Table S6. Impact of the ACA Medicaid Expansion on Family Functioning Among Children from Low-Income Households (< 138% FPL) – Additional Sensitivity Checks**

| <b>A. Early vs. Late Exclusions</b> | Reading Outside School |         | Parental Help with Homework |          | Dinner Together (4 or more days in a week) |         |
|-------------------------------------|------------------------|---------|-----------------------------|----------|--------------------------------------------|---------|
| Exclusion                           | Early                  | Late    | Early                       | Late     | Early                                      | Late    |
| Expansion                           | 2.277*                 | 2.317** | -0.210                      | -0.375** | 0.056**                                    | 0.046** |
|                                     | (1.075)                | (0.883) | (0.130)                     | (0.111)  | (0.019)                                    | (0.013) |
| Mean of DV                          | 17.92                  | 17.92   | 4.23                        | 4.23     | 0.897                                      | 0.897   |
| Observations (Child-year)           | 5,170                  | 4,950   | 4,150                       | 3,970    | 8,140                                      | 10,560  |
| Observations (Child)                | 1,810                  | 2,340   | 1,810                       | 2,340    | 1,820                                      | 2,340   |
| <b>B. CCS Adoption</b>              | Reading Outside School |         | Parental Help with Homework |          | Dinner Together (4 or more days in a week) |         |
| Expansion                           | 2.40**                 |         | -0.269*                     |          | 0.063**                                    |         |
|                                     | (0.835)                |         | (0.106)                     |          | (0.019)                                    |         |
| Mean of DV                          | 17.92                  |         | 4.23                        |          | 0.897                                      |         |
| Observations (Child-year)           | 11,580                 |         | 9,310                       |          | 11,391                                     |         |
| Observations (Child)                | 2,520                  |         | 2,520                       |          | 2,530                                      |         |
| <b>C. No Sampling Weights</b>       | Reading Outside School |         | Parental Help with Homework |          | Dinner Together (4 or more days in a week) |         |
| Expansion                           | 0.940~                 |         | -0.24**                     |          | 0.026*                                     |         |
|                                     | (0.489)                |         | (0.079)                     |          | (0.012)                                    |         |
| Mean of DV                          | 17.92                  |         | 3.347                       |          | 0.897                                      |         |
| Observations (Child-year)           | 16,320                 |         | 13,180                      |          | 16,510                                     |         |
| Observations (Child)                | 4,170                  |         | 4,160                       |          | 4,230                                      |         |

Notes: Each column of each panel corresponds to a different OLS regression model. Each model includes wave and child fixed effects and sampling weights. Expansion represents  $\beta_1$  from equation (1), and measures the average effect of the Medicaid expansions after it took place. Panel A adjusts for early and late expansion exclusions; Panel B adjusts for state-year, common core adoption; and Panel C provides unweighted estimates. Mean of each dependent variable (DV) provides the within-child average of the DV after controlling for just wave fixed effects. Heteroscedasticity-robust standard errors, in parentheses, are clustered at the state level. Sample sizes are rounded to the nearest 10 as per dataset guidelines. ~  $p < 0.10$ , \*  $p < 0.05$ , \*\*  $p < 0.01$ , \*\*\*  $p < 0.001$ .

**Table S7. Impact of the ACA Medicaid Expansion on Family Functioning Among Children from Low-Income Households (< 138% FPL) – Wild Bootstrap and Multiple Hypothesis Testing Corrected P-Values**

| <b>A. Academic Outcomes</b>       | Reading Scores          | Math Scores                 |                                            |
|-----------------------------------|-------------------------|-----------------------------|--------------------------------------------|
|                                   | (1)                     | (2)                         |                                            |
| Expansion                         | 1.151~                  | 0.111                       |                                            |
| Baseline P-Value                  | 0.055                   | 0.919                       |                                            |
| Sharpened Q-value                 | 0.074                   | 0.87                        |                                            |
| Wild Bootstrap P-Value            | 0.110                   | 0.616                       |                                            |
| <b>B. Socioemotional Outcomes</b> | Externalizing Behaviors | Internalizing Behaviors     | Social Skills                              |
|                                   | (1)                     | (2)                         | (3)                                        |
| Expansion                         | 0.007                   | 0.023                       | 0.028                                      |
| Baseline P-Value                  | 0.81                    | 0.93                        | 0.80                                       |
| Sharpened Q-value                 | 0.87                    | 0.87                        | 0.87                                       |
| Wild Bootstrap P-Value            | 0.34                    | 0.95                        | 0.99                                       |
| <b>C. Family Functioning</b>      | Reading Outside School  | Parental Help with Homework | Dinner Together (4 or more days in a week) |
|                                   | (1)                     | (2)                         | (3)                                        |
| Expansion                         | 2.405**                 | -0.267*                     | 0.048**                                    |
| Baseline P-Value                  | 0.006                   | 0.017                       | 0.002                                      |
| Sharpened Q-value                 | 0.022                   | 0.036                       | 0.017                                      |
| Wild Bootstrap P-Value            | 0.062                   | 0.035                       | 0.005                                      |

Notes: Each cell of each panel corresponds to a different OLS regression model. Expansion represents  $\beta_1$  from equation (1), and measures the average effect of the Medicaid expansions after it took place. The regressions also include wave, child fixed effects, state-level covariates, and are weighted by sampling weights. We report the baseline p-value from Table 2 on this coefficient for easy reference here. Sharpened q-value provides False Discovery Rate (FDR) q-values. The FDR is the expected proportion of rejections that are type I errors (false rejections) given 8 outcomes are being tested and adjusted for multiple hypothesis testing. Sharpened q-values are introduced in Benjamini, Krieger, and Yekutieli (2006) [BKY, 2006]. We generate the BKY (2006) sharpened two-stage q-values as described in Anderson (2008). Wild cluster bootstrap p-values are only recommended if there are very few clusters, especially treatment clusters, in the analytical sample. With 25 expansion states (i.e. treatment clusters) and 16 non-expansion states in our sample (i.e. control clusters), cluster robust standard errors are valid for inference. Nevertheless, we also report wild cluster bootstrapped p-values created using “boottest” command in STATA from 1,000 replications which provides more conservative standard errors for inference (Cameron & Miller, 2015). Because this command does not support sampling weights, we exclude weights here making these estimates more conservative. Sample sizes are rounded to the nearest 10 as per dataset guidelines. ~  $p < 0.10$ , \*  $p < 0.05$ , \*\*  $p < 0.01$ , \*\*\*  $p < 0.001$ .

**Figure S1. Analytic Sample Construction**

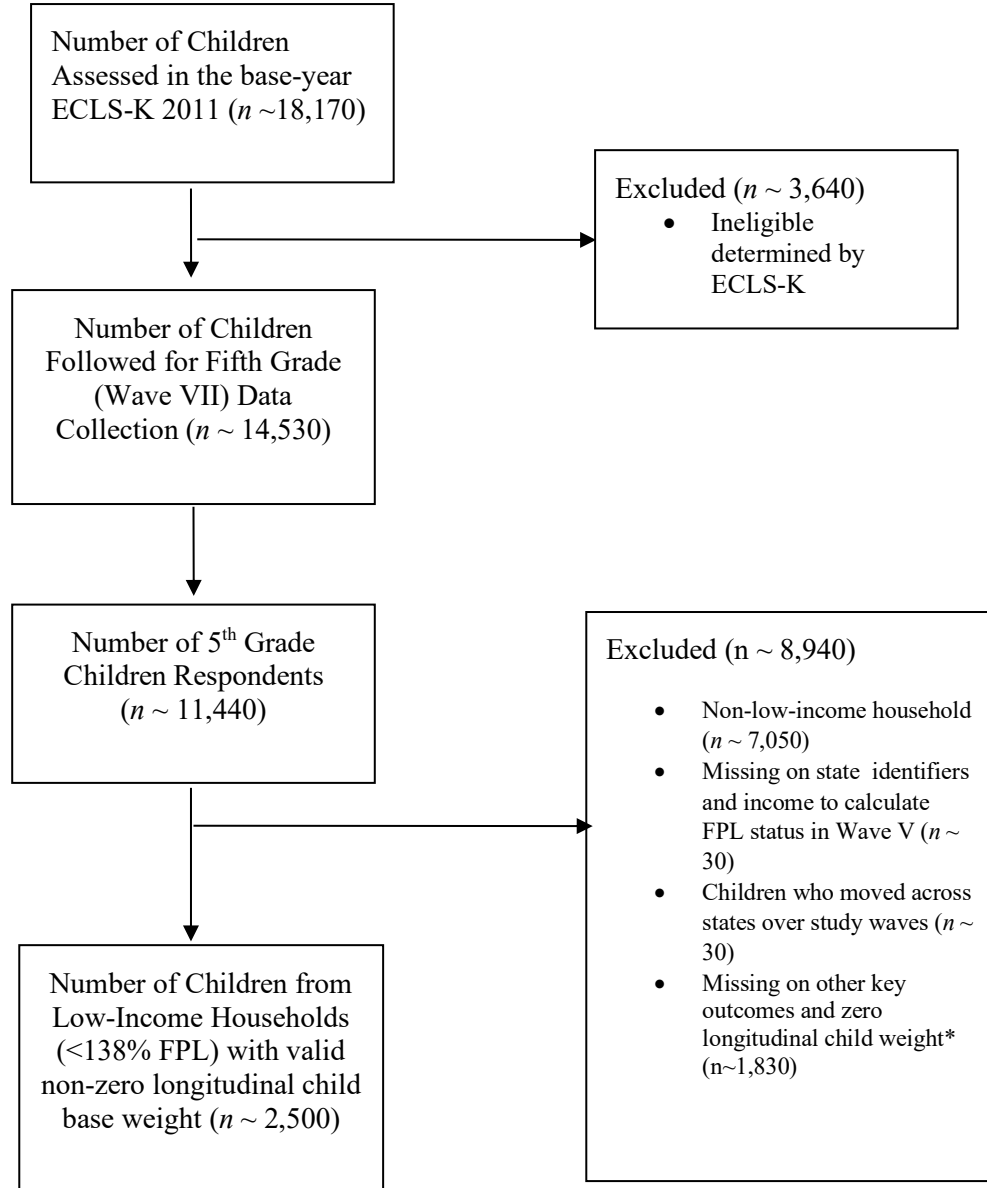

Notes: Sample sizes are approximate (varies across model specifications); and rounded to the nearest 10 based on dataset guidelines. \* The ECLS-K data manual recommends the use of sampling weights as appropriate to balance the trade-off between non-response bias and sample size considerations; therefore we chose the longitudinal weight - w9c29p\_9a0 for our analyses that provides appropriate adjustments for attrition and non-response bias in the survey waves we use in our sample.



**Figure S2. Raw trends in Outcomes of Interest by Pre-ACA Parental Eligibility Status**

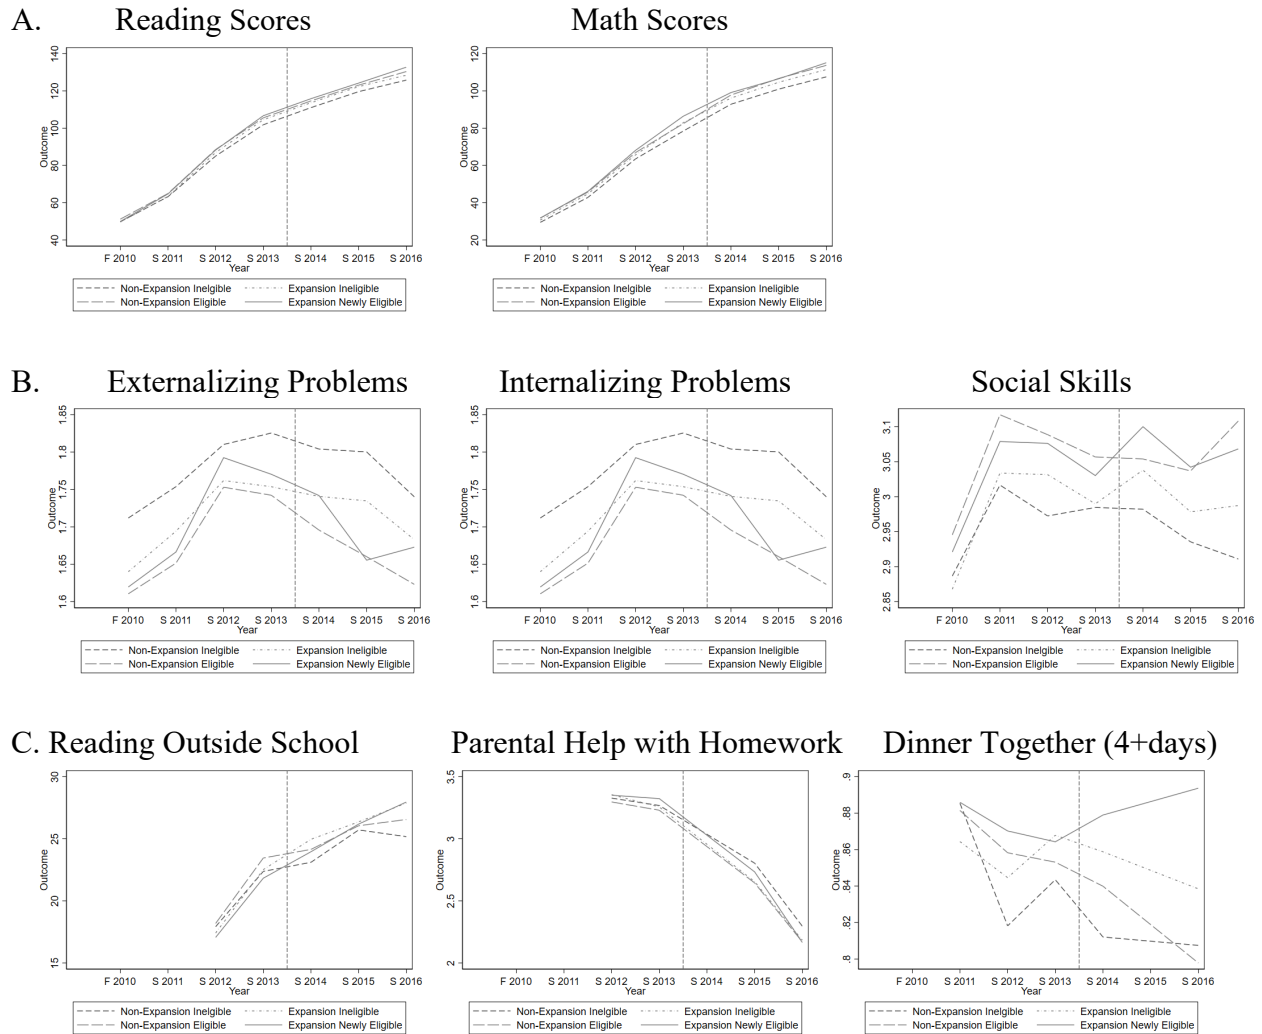

Notes: Data from ECLS:K 2011. Expansion states are the treatment states, and non-expansion states are the control states. The x-axis (Year) represents the survey wave, F=fall and S=spring. The vertical line represents January 2014, when the ACA Medicaid expansions were largely implemented. Sample is limited to children in households with incomes below 138% FPL.

**Figure S3. Common Core Adoption by States over Time**

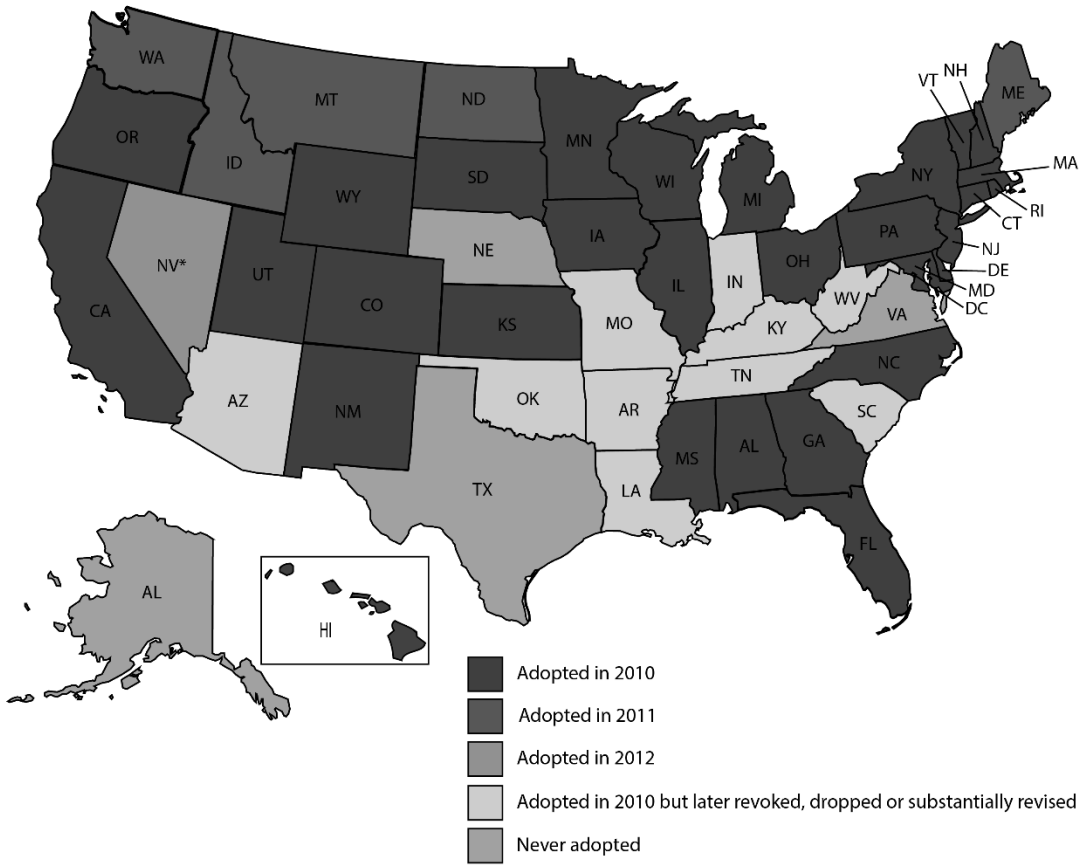

Source: National Conference of State Legislatures, 2014
